**Title:** A noninvasive clinical method to measure *in vivo* mechanical strains of the lamina cribrosa by optical coherence tomography

**Running Head:** Clinical Strain Method

**Authors:** Vanessa Hannay<sup>1</sup>, Cameron A. Czerpak<sup>1</sup>, Harry A. Quigley<sup>2</sup>, Thao D. Nguyen<sup>1,2</sup>

**Affiliations:** <sup>1</sup>Department of Mechanical Engineering, The Johns Hopkins University, Baltimore, MD, 21218, USA.

<sup>2</sup>Department of Ophthalmology, Wilmer Ophthalmological Institute, Johns Hopkins University School of Medicine, Baltimore, MD 21287, USA.

**Corresponding Author:** Harry A. Quigley MD, 900 Bellemore Road, Baltimore, Maryland USA 21210. Tel: (443) 742 7079; Fax: (410) 955 1985. Email: [hquigley@jhmi.edu](mailto:hquigley@jhmi.edu).

**Conflict of Interest:** The authors have no conflicting relationships related to the drugs or devices used in this research. Heidelberg Engineering donated the imaging device, but were not involved with data analysis or interpretation, nor with drafting of the manuscript.

**Financial Support:** This research was funded in part by NIH NEI R01 EY02120 (Dr. Quigley), P30 EY01765 (Wilmer Institute Core Grant), Research to Prevent Blindness, and the A. Edward Maumenee Professorship (Dr. Quigley) and Brightfocus G2021012S (Nguyen).

**Key words:** strain, glaucoma, lamina cribrosa, optic nerve head, digital volume correlation, optical coherence tomography, biomarker.

**Abbreviations:** LC = lamina cribrosa, ONH = optic nerve head, OCT = spectral domain optical coherence tomography, RNFL = retinal nerve fiber layer, MD = mean deviation, VFI = visual field index, IOP = intraocular pressure, dB = decibels.

## ABSTRACT

**Objective:** To measure mechanical strain of the lamina cribrosa (LC) after intraocular pressure (IOP) change produced one week after a change in glaucoma medication.

**Design:** Cohort study.

**Participants:** Adult glaucoma patients (23 eyes, 15 patients) prescribed a change in IOP-lowering medication.

**Intervention:** Non-invasive optical coherence tomography (OCT) imaging of the eye.

**Main Outcomes:** Deformation calculated by digital volume correlation of OCT scans of the LC before and after IOP lowering by medication.

**Results:** Among 23 eyes, 17 eyes of 12 persons had IOP lowering  $\geq 3$  mmHg (reduced IOP group) with tensile anterior-posterior  $E_{zz}$  strain =  $1.0\% \pm 1.1\%$  ( $p = 0.003$ ) and compressive radial strain ( $E_{rr}$ ) =  $-0.3\% \pm 0.5\%$  ( $p=0.012$ ; random effects models accounting inclusion of both eyes in some persons). Maximum in-plane principal (tensile) strain and maximum shear strain in the reduced IOP group were:  $E_{max} = 1.7\% \pm 1.0\%$  and  $\Gamma_{max} = 1.4\% \pm 0.7\%$ , respectively (both  $p < 0.0001$  versus zero). Reduced IOP group strains  $E_{max}$  and  $\Gamma_{max}$  were significantly larger with greater %IOP decrease ( $< 0.0001$ ,  $< 0.0001$ ). The compliance of the  $E_{zz}$ ,  $E_{max}$ , and  $\Gamma_{max}$  strain response, defined as strain normalized by the IOP decrease, were larger with more abnormal perimetric mean deviation or visual field index values (all  $p \leq 0.02$ ). Strains were unrelated to age (all  $p \geq 0.088$ ). In reduced IOP eyes, mean LC anterior border posterior movement was only  $2.05 \mu\text{m}$  posteriorly ( $p=0.052$ ) and not related to % IOP change ( $p=0.94$ , random effects models). Only  $E_{rr}$  was significantly related to ALD change, becoming more negative with greater posterior LC border change ( $p=0.015$ ).

**Conclusion:** LC mechanical strains can be effectively measured by changes in eye drop medication using OCT and are related to degree of visual function loss in glaucoma.

**Trial Registration:** ClinicalTrials.gov Identifier: NCT03267849

## Introduction

Glaucoma is the second most common cause of blindness worldwide<sup>1</sup> and numerous studies show that lowering intraocular pressure (IOP) slows its progressive vision loss.<sup>2</sup> The level of IOP is a major risk factor for glaucomatous damage, whether IOP is within or above the normal range.<sup>3</sup> Methods to lower IOP include surgery, laser treatment, and eye drop medication. While modest IOP lowering leads to stable visual function in many glaucoma patients, a minority have a much more aggressive course.<sup>4</sup> At present there are not consistent biomarkers that indicate which eyes will have more rapid progression with standard initial therapy.

Glaucomatous neuropathy results from death of retinal ganglion cells, due in part to injury to their axons at the optic nerve head (ONH) within its lamina cribrosa (LC).<sup>5</sup> The upper and lower zones of the LC, through which the most susceptible axons pass, have been shown to have less dense connective tissue structure and to undergo greater mechanical strain with *in vitro* inflation testing.<sup>6</sup> This suggests that a clinical measure of LC strain might provide valuable information on which patients and what LC zones would have greater susceptibility to rapid progressive worsening.<sup>7,8</sup> We and others have measured the short-term strain responses of the LC in glaucoma patients after both increases and decreases in IOP, using digital volume correlation of spectral domain (SD)--optical coherence tomography (OCT) images taken at two different IOPs.<sup>9,10,11,12,13,14</sup> With modest IOP lowering, biomechanical strains are

regularly obtainable and fit with the expected deformation of the LC tissue, undergoing expansion in the anterior—posterior direction and contraction in diameter.<sup>15</sup> Artificial elevation of IOP produced corresponding compression of the lamina. Most importantly, our data and that of Girard and co-workers indicate that eyes with greater loss of RGC have greater LC strain.<sup>15,16</sup> These data suggest that short-term LC strain measurements may provide biomarkers for glaucoma susceptibility.

In the present report, we applied digital volume correlation (DVC) to analyze OCT images of the LC in glaucoma patients before and one week after a change of IOP-lowering eye medication to calculate the strains in the LC. Our purpose was to produce a method for clinical strain assessment that would be compatible with standard management approaches in initial glaucoma therapy for any office treating patients that have OCT capability.

## **Methods**

### **Experimental subjects**

The study was approved by the Johns Hopkins Institutional Review Board and written informed consent was obtained from all subjects, who were patients from Glaucoma Center of Excellence, Wilmer Ophthalmological Institute, Johns Hopkins Medicine. Data are presented for 23 eyes of 15 patients. Data from additional patients were excluded due to poor image quality. Among the 23 eyes, all but two were from patients starting hypotensive eye drops, while one eye was from a patient instructed to stop eye drops, while the final patient started oral glaucoma medication.

Eyes were imaged by OCT (Spectralis, Heidelberg Engineering, Heidelberg, Germany) before and  $7.3 \pm 1.4$  days after IOP change, using methods described previously.<sup>15</sup> Prior to the first imaging session, all eyes underwent a standard glaucoma examination to assess disease progression, which measured their average retinal nerve fiber layer (RNFL) thickness and visual field status (Zeiss Humphrey Field Analyzer (HFA2i or 3) 24-2 Swedish Interactive Threshold Algorithm (SITA Standard) field tests; Zeiss

HFA2i, Dublin, CA) with indices mean deviation (MD) and visual field index (VFI) within 3 months of imaging. Retinal nerve fiber layer (RNFL) thickness was measured using Cirrus OCT (Zeiss). The average MD for the overall group of 23 eyes was  $-5.4 \text{ dB} \pm 5.7 \text{ dB}$ , with 15 eyes having MD  $> -6 \text{ dB}$ , 5 eyes with moderate damage ( $-12 \text{ dB} < \text{MD} < -6 \text{ dB}$ ), and 3 eyes with severe damage (MD  $< -12 \text{ dB}$ ). The average thickness of the retinal nerve fiber layer (RNFL) ranged from 54 to 83  $\mu\text{m}$ . The age range of the 15 study subjects was 30 to 80 years (mean =  $62.1 \pm 12.4$  years; median, 64 years).

We divided the 23 eyes into reduced IOP and unchanged IOP groups, based on whether or not they underwent significant IOP change. Reduced IOP eyes (n=17 eyes, 12 patients) was defined as eyes with an IOP decrease  $\geq 3 \text{ mmHg}$ , while unchanged IOP eyes (6 eyes, 5 patients) had  $\leq 1 \text{ mmHg}$  change. None of the eyes had IOP change between 1 and 3 mmHg. The one patient who stopped eye drops to attempt a change in IOP had no change and is assigned to the unchanged IOP group. The reduced IOP group had a higher average baseline IOP ( $20.3 \pm 5.8 \text{ mmHg}$ ) than the unchanged IOP group ( $12.5 \pm 5.2 \text{ mmHg}$ ), but the two groups did not differ in the average age, MD, VFI, or RNFL thickness.

### **Optical coherence tomography imaging**

IOP was measured using a rebound tonometer (iCare Finland Oy) directly before each imaging session. Baseline and post-treatment IOP were each recorded as the mean of six consecutive measurements per eye. The iCare IOP measurements were compared to those acquired on the same visit using Goldmann applanation tonometry to verify they did not differ significantly. The IOL Master (Zeiss Meditec, Dublin, CA) was used to measure the axial lengths and corneal curvatures of each eye. The curvature values were input to Spectralis to calibrate the magnification. The Spectralis was set to high resolution and auto-brightness mode. At each imaging session, three consecutive OCT image volumes, consisting of 24 radial scans (ONH-RC scan) equally spaced circumferentially around the ONH, were acquired using enhanced depth imaging mode for each eye. To optimize the image quality of the

scans, the visible tissue was centered such that it occupied the lower two-thirds of the window and its brightness was adjusted until it reached the maximum. We refer to the anterior-posterior direction as the Z-direction, the radial direction as the R-direction, and the circumferential direction as the  $\Theta$ -direction. The in-plane resolution of each scan (RZ plane) was 768 x 495 pixels, which translated to 5.17 – 6.25  $\mu\text{m}$  in R and 3.87  $\mu\text{m}$  in Z. At Bruch's membrane opening, the out-of-plane resolution was approximately 108  $\mu\text{m}$  in  $\Theta$ .

### **Image segmentation**

Each of the 24 radial scans was segmented by hand using FIJI.<sup>15</sup> Within each OCT scan, the end of Bruch's membrane opening (BMO) was marked on either side of the ONH and the anterior border of the LC was marked where visible between either side of the BMO (Figure 1). The anterior LC markings were fit to a continuous line using piecewise linear interpolation, and a parallel curvilinear border was drawn 250  $\mu\text{m}$  posterior to the anterior border to represent the posterior LC, since the actual posterior limit of the LC is typically not visible in OCT images. The LC region was defined as the area between the two LC borders and within BMO delineated by vertical lines. LC thickness of 250  $\mu\text{m}$  is based on our past microscopic measurements of the human LC.<sup>17</sup>

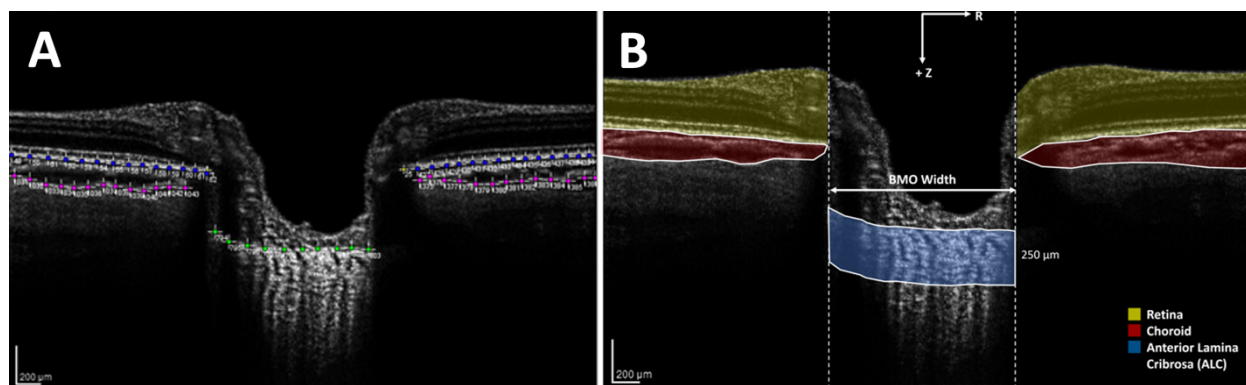

Figure 1: A) Segmentation of slice 1 of the 24 OCT images of the ONH. B) The segmented regions including the retina, choroid, BMO, and anterior LC. The anterior LC represents an area of 250  $\mu\text{m}$  below the marked LC surface.

### Digital volume correlation and strain calculations

Prior to processing with digital volume correlation (DVC)<sup>18</sup>, the speckle pattern in OCT images was enhanced with contrast-limited adaptive histogram equalization (CLAHE) in FIJI. A gamma correction of 1.75 was then used to reduce noise in areas of low signal. Images were next imported into MATLAB 2019a (Mathworks, Natick, MA) to produce a 3-dimensional 3D matrix of 8-bit intensity values. DVC was applied to OCT image pairs before and after IOP change to estimate the 3D displacement field. These were smoothed to calculate the components of the Green-Lagrange strain tensor from the gradient of the displacement field as described in previous work.<sup>15</sup> The three 3 normal strains components,  $E_{zz}$ ,  $E_{rr}$ , and  $E_{\theta\theta}$ , indicate local expansions (positive) or contractions (negative) of the tissue in the thickness ( $z$ ), radial ( $r$ ), and circumferential ( $\theta$ ) directions. The three shear strain components  $E_{rz}$ ,  $E_{r\theta}$ , and  $E_{\theta z}$ , denote local angular distortions in their respective planes. For example,  $E_{\theta z}$  for a cylinder results from a twist and  $E_{r\theta}$  indicates transformation of the circular cross-section into an elliptical cross-section. From these strain components, we calculated the maximum principal strain ( $E_{max}$ ) and maximum

shear strain ( $\Gamma_{max}$ ) in the RZ plane of the radial OCT images. We also divided strain data into the central and peripheral lamina, using half the radius of the LC outer border as separation. In addition, we divided the LC strain data by quadrant, using an X-shaped delineation to segregate superior, temporal, inferior and nasal quadrants.

In addition to LC strains, we measured the change in position of the anterior LC border from its displacement ( $U_z$ ) relative to the position of the BMO. LC border change was calculated as an average displacement across the entire LC border.

For each eye, we estimated the baseline displacement and strain errors by applying DVC to consecutive OCT image volumes acquired approximately 2 minutes apart of the same optic nerve head at the baseline IOP.<sup>15</sup> Since the consecutive images were acquired under nominally the same IOP, non-zero values of strains and displacements denote error caused by the imaging conditions, image quality, and the imaging correlation algorithm. DVC fails or produces high baseline errors in regions of low contrast, such as where the LC is shadowed by overlying blood vessels. These regions excluded from subsequent strain analyses by filtering out points where the correlation coefficient was below 0.055. The resulting average area of accurate DVC correlation was  $51.1 \pm 21.4\%$  across the 23 image sets. The average baseline displacement error averaged over the LC were  $0.016 \pm 0.201\mu\text{m}$  for  $U_z$ ,  $0.065 \pm 0.267\mu\text{m}$  for  $U_r$ , and  $1.43 \pm 4.25\mu\text{m}$  for  $U_\theta$ . The average baseline strain errors were  $0.037 \pm 0.118\%$  for  $E_{zz}$ ,  $-0.020 \pm 0.061\%$  for  $E_{rr}$ ,  $-0.019 \pm 0.150\%$  for  $E_{\theta\theta}$ ,  $0.022 \pm 0.102\%$  for  $E_{r\theta}$ ,  $0.018 \pm 0.077\%$  for  $E_{rz}$ , and  $-0.029 \pm 0.266\%$  for  $E_{\theta z}$ .

### Statistical analysis

We used paired and unpaired t-tests, as appropriate to determine the significance of the mean LC strains compared to no change and to baseline and correlation errors. Relationships between strains and other parameters including age, IOP, LC border movement, and glaucoma damage (MD, VFI, and



RNFL thickness) were analyzed using analysis of variance and random effects multivariable regression models for the data from the reduced IOP group. For the unchanged IOP group, there was only one pair of eyes from one of the patients, so both eyes were included in the analysis of this group of 6 total eyes. For all statistical analyses, a p-value of 0.05 or less was considered significant.

## Results

### Intraocular pressure and lamina cribrosa depth changes

One week after medication change, the reduced IOP group had a mean IOP change of  $-5.8 \pm 1.5$  mmHg ( $p \leq 0.0001$ , paired t-test, 17 eyes of 12 patients), representing a mean decrease from baseline of  $-29.6\% \pm 8.2\%$ . The range of IOP change in this group was -3 to -8 mm Hg. Mean IOP change in the unchanged IOP group was  $-0.3 \pm 0.8$  mmHg ( $p=0.36$ , paired t-test, 6 eyes of 5 patients), or  $-2.7\% \pm 8.1\%$ , which was insignificantly below baseline.

The anterior lamina depth (ALD) change from baseline after IOP change was defined as positive if the anterior LC surface moved posteriorly (away from the cornea) and negative if it moved anteriorly (towards the cornea). For reduced IOP eyes, mean ALD change was  $2.05 \mu\text{m}$  (95% confidence interval (CI)=  $(-0.02, 4.1)$ , random effects model accounting effects of inclusion of both eyes for some patients;  $p=0.052$  compared to zero change). Thus, there was only a small mean posterior movement of the LC, with some eyes moving posteriorly and some anteriorly. ALD change was not significantly related to IOP change nor to percent IOP change ( $p=0.94$ , random effects model). In the unchanged IOP group, mean ALD change was  $+1.50 \pm 2.27 \mu\text{m}$ , but not significantly different from zero change ( $p=0.17$ , paired t test).

### LC strains

For the reduced IOP group, the LC strain response to IOP decrease were significantly larger than the baseline (reproducibility) error for  $E_{zz}$  and  $E_{rr}$  strains ( $p=0.002$ ,  $0.011$ , respectively, random effects models) (Table 1, Figure 2). The normal strain in the thickness direction  $E_{zz} = 1.0\% \pm 1.1\%$  was tensile (greater than zero,  $p = 0.003$ ) and the radial strain  $E_{rr}$  was compressive,  $-0.3\% \pm 0.5\%$ ;  $p=0.012$ ). In addition, the maximum principal (tensile) strain and maximum shear strain in the reduced IOP group were significantly greater than zero:  $E_{max} = 1.7\% \pm 1.0\%$  and  $\Gamma_{max} = 1.4\% \pm 0.7\%$ ; (both  $p<0.0001$ ).

Table 1: Lamina cribrosa strains in the reduced IOP and unchanged IOP groups. Mean strains  $\pm$  standard deviation (strains are unitless). N=17 eyes in reduced IOP group and 6 eyes in unchanged IOP group.

|                    | Reduced IOP        | P-Value           | Unchanged IOP      | P-Value      |
|--------------------|--------------------|-------------------|--------------------|--------------|
| $E_{zz}$           | $0.010 \pm 0.011$  | <b>0.003</b>      | $0.003 \pm 0.003$  | 0.054        |
| $E_{rr}$           | $-0.003 \pm 0.005$ | <b>0.012</b>      | $0.001 \pm 0.009$  | 0.76         |
| $E_{\theta\theta}$ | $-0.001 \pm 0.009$ | 0.70              | $-0.002 \pm 0.009$ | 0.76         |
| $E_{r\theta}$      | $0.002 \pm 0.008$  | 0.35              | $-0.011 \pm 0.017$ | 0.20         |
| $E_{\theta z}$     | $-0.001 \pm 0.005$ | 0.32              | $0.001 \pm 0.006$  | 0.65         |
| $E_{rz}$           | $0.000 \pm 0.006$  | 0.77              | $-0.001 \pm 0.004$ | 0.63         |
| $E_{max}$          | $0.017 \pm 0.010$  | <b>&lt;0.0001</b> | $0.013 \pm 0.012$  | 0.053        |
| $\Gamma_{max}$     | $0.014 \pm 0.007$  | <b>&lt;0.0001</b> | $0.011 \pm 0.009$  | <b>0.041</b> |

For the unchanged IOP group, which served here as a form of control group, strains had only borderline significant differences from zero in  $E_{zz}$ ,  $E_{max}$ , and  $\Gamma_{max}$  ( $p=0.054$ ,  $0.053$ ,  $0.041$ , respectively). The mean  $E_{zz}$  for this group was  $0.3\% \pm 0.3\%$ , 3 times smaller than that of the reduced IOP eyes and not significantly greater than baseline error ( $p=0.08$ ).

There were no significant differences in either group in  $E_{zz}$  or  $E_{max}$  strains in the central compared to the peripheral LC (all  $p > 0.63$  for reduced IOP group; all  $p > 0.34$  for unchanged IOP group), nor did strains differ significantly by LC quadrant (all  $p > 0.65$  for reduced IOP group; all  $p > 0.66$  for unchanged IOP group).

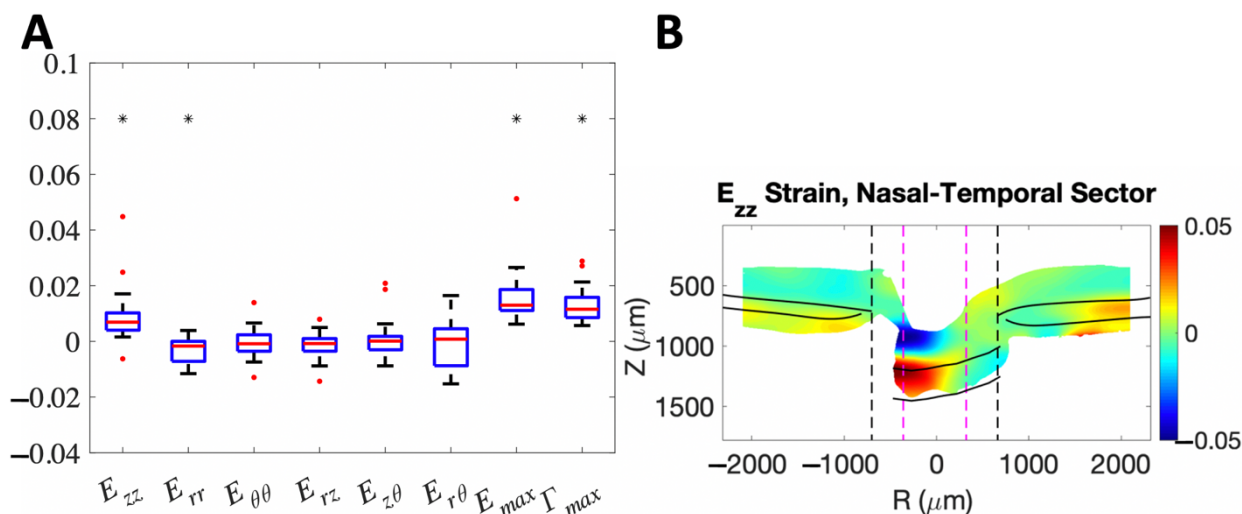

Figure 2: A) Strains in reduced IOP group (n=17 eyes) where asterisk (\*) indicates  $p$ -value  $\leq 0.05$ . B) Example of strain map for  $E_{zz}$  strain for a radial scan along the inferior-superior direction for representative eye from reduced IOP group (IOP 7 mm Hg lower than baseline), showing a regionally varying tensile strain (red region, thickening) in the LC.

### LC strains in reduced IOP group compared to other variables

In the reduced IOP group, strains  $E_{max}$  and  $\Gamma_{max}$  were significantly larger with greater % IOP decrease while  $E_{rr}$  was significantly more negative with greater % IOP decrease (for % decrease:  $< 0.0001$ ,  $< 0.0001$ , and  $p = 0.048$ , respectively, random effects models; Figure 3).  $E_{max}$  and  $\Gamma_{max}$  strains were also significantly associated with the magnitude of IOP decrease ( $p = 0.0029$ ,  $0.0020$ , respectively, random effects models). All strains were unrelated to patient age (all  $p \geq 0.088$ ). Among all strains, only  $E_{rr}$  was significantly related to ALD change, becoming more negative with greater posterior ALD change

( $p=0.015$ ). Strain data were compared to the degree of glaucoma damage in visual field and RNFL thickness. Strains were not significantly related to either MD or VFI indexes in field data (all  $p \geq 0.14$ ). Strains  $E_{zz}$ ,  $E_{max}$ , and  $\Gamma_{max}$  were larger as RNFL thickness increased in models (all  $p < 0.001$ ). This outcome appeared to be due to 2 outlying values with higher RNFL thickness (Supplemental data).

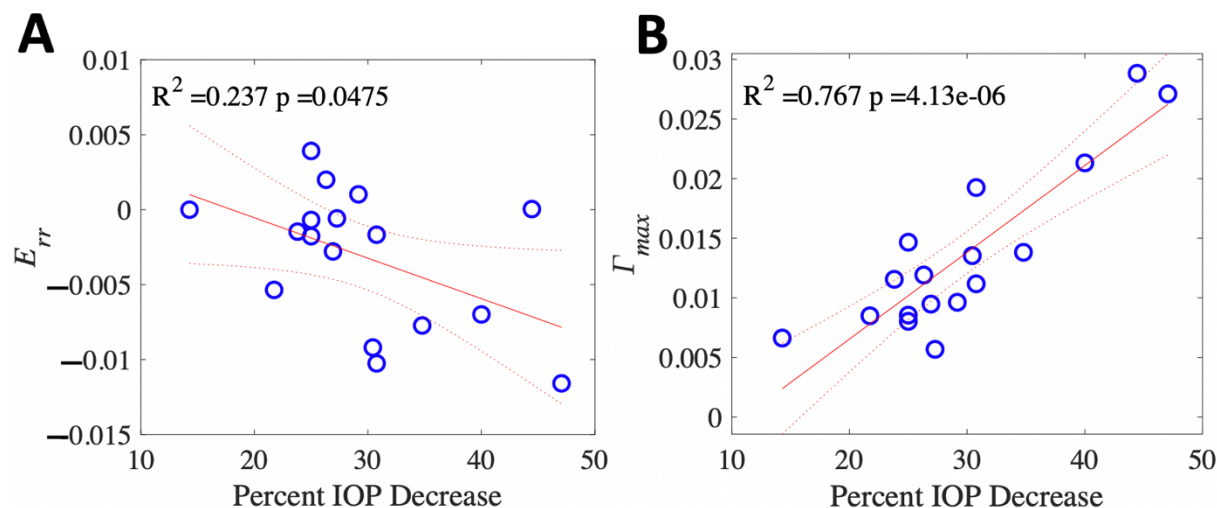

Figure 3: A higher percent decrease in IOP was associated with A) more radial contraction (negative  $E_{rr}$ ) and B) larger maximum shear strain ( $\Gamma_{max}$ ). Data from reduced IOP group ( $n=17$  eyes). Linear regression analysis.

Since we determined that strains were related to the degree of IOP lowering, we calculated for each strain response the value called compliance, defined as the strain per mmHg IOP decrease. In random effects models, compliances of strains  $E_{zz}$ ,  $E_{max}$ , and  $\Gamma_{max}$  were significantly larger with more abnormal MD index value in the visual field ( $p=0.02$ ,  $0.001$ ,  $0.011$ , respectively, Figure 4). Likewise, compliances for  $E_{max}$  and  $\Gamma_{max}$  were larger with worsening VFI ( $p=0.015$ ,  $0.010$ , respectively). Compliances for the same 3 strains ( $E_{zz}$ ,  $E_{max}$ , and  $\Gamma_{max}$ ) were significantly related to RNFL thickness, but when the 2 outlying values were omitted from the analysis there was no demonstrable relation of strains to RNFL thickness.

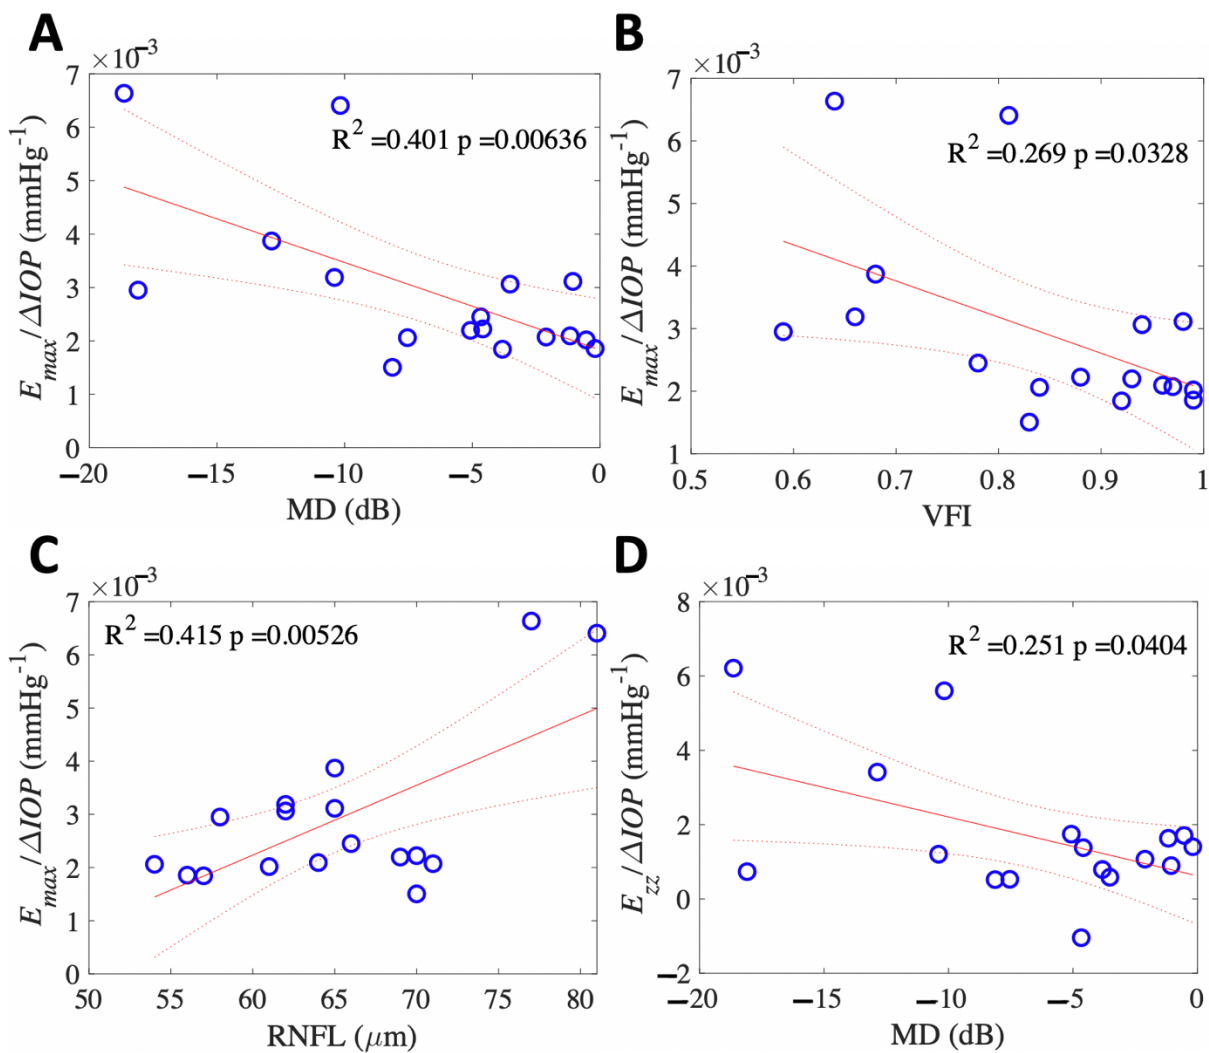

Figure 4: Eyes with greater glaucoma progression as indicated by A) more negative MD and B) lower VFI had greater compliance of maximum principal strain ( $E_{max}/\Delta IOP$ ) indicating a softer strain response. C) However, a thicker RNFL thickness was associated with greater compliance of  $E_{max}$ . D) A more negative MD was associated with greater compliance of  $E_{zz}$ . Data from reduced IOP group (n=17 eyes). Linear regression analysis.

## Discussion

These data confirm our previous findings that reduction of IOP leads to measurable strains in the LC with sequential OCT imaging. There are several similarities to our initial reports. In Czerpak et al.<sup>15</sup>, we imaged eyes before and 20 minutes after post-operative laser suturelysis in eyes that had undergone trabeculectomy. The patients in that report had somewhat greater structural and functional damage (mean MD =  $-11.5 \pm 8.9$  dB) than the eyes in this dataset (for reduced IOP group: mean MD =  $-6.6 \pm 5.8$  dB), and the suturelysis eyes had greater mean IOP lowering. Despite these differences, the strains measured one week after changes in eye medication were of similar magnitude to those immediately after suturelysis. This suggests that after IOP lowering the LC exhibits viscoelastic behavior with strain increasing more at one week than after 20 minutes. One group found that experimental IOP increase by 2 minutes of ophthalmodynamometry pressure on the eye has also demonstrated measurable strains, but with dramatically greater IOP elevations.<sup>9</sup> Our findings show that a simple change in eye drop medication produces strains in the LC that are assessable at a typical follow-up visit. There may be an advantage to methods of IOP lowering for which strain can be measured after at least one week in order to produce more easily measurable strain values.

Furthermore, these data provide further evidence that eyes with greater visual field damage have greater, not less, LC strain. We<sup>15</sup> and others<sup>16</sup> have previously found that eyes exhibiting worse injury have a more compliant LC. In fact, we also found similarly in study of control and glaucoma eyes *post mortem* that eyes with worse histological axon loss had greater compliance than mildly damaged eyes.<sup>19,20,21</sup> These findings seem to contradict prior conclusions that glaucoma eyes are stiffer after suffering damage. Prior research, however, did not routinely measure LC strains, but rather indirect measures of portions of the sclera more distant from the peripapillary area.<sup>22,23</sup> We previously measured the LC strain in *ex vivo* inflation tests and found that the LC strain response of mildly damaged glaucoma eyes was stiffer than those of undamaged normal eyes.<sup>21</sup> The most relevant zones for glaucoma damage

are in the immediate ONH region. Conceivably, the greater strains we have estimated in the LC with worse damage could result from greater glaucoma damage causing remodeling in which LC beams become thinner.<sup>24</sup> Indeed, LC curvature in inflation testing was greater with greater damage, implying a more compliant response.<sup>25</sup> Both monkeys with chronic IOP elevation and human glaucoma eyes are reported to have thinner than normal LC, suggesting more compliant not stiffer behavior.<sup>26,27</sup> The peripapillary sclera in experimental and human glaucoma has a less ordered circumferential fiber pattern<sup>28,29</sup> that may behave more rigidly, intensifying the effect of the translaminar pressure gradient to cause greater LC strain. Indeed, we have estimated posterior scleral strains using the OCT method described here and find that scleral strains are proportionately smaller than the LC of the same eye, and that the strains in the two zones are significantly related to each other.<sup>30</sup> We must keep in mind that our data are cross-sectional and do not indicate what the strain state of damaged glaucoma eyes was at baseline.

The medication change approach produced not only similar magnitudes of strains, but strain change in the same directions as our previous data after suturelysis. IOP decrease in both paradigms caused the LC to expand in thickness ( $E_{zz}$  strain) and to contract in radius ( $E_{rr}$  strain). One could visualize this change as if the LC were a container that changed shape from a tuna fish can to an orange juice can. In both studies, larger IOP decreases led to more tensile  $E_{zz}$  and greater maximum principal ( $E_{max}$ ) and maximum shear strains ( $\Gamma_{max}$ ). Likewise, there were consistent findings that greater compliance of  $E_{max}$  and  $\Gamma_{max}$  were associated with worse MD and VFI visual field indexes. In both situations, the ALD change was minimal in this time frame.

Interestingly, the single difference with our previous study was the fact that greater strain was associated with thicker average RNFL in this study, but thinner RNFL in our suturelysis data. However, this result deserves further study with greater numbers of eyes, as it appears to have been generated largely by 2 outlying values. It is well-known that RNFL thickness more rapidly declines than visual field

sensitivity in glaucoma. In our previous study, the vast majority of eyes had RNFL average thickness values lower than 65  $\mu\text{m}$ , while in the present study, the majority had RNFL thickness greater than 65  $\mu\text{m}$ . By contrast, the visual field indices are a more continuous reflection of glaucoma damage, while the RNFL data decline earlier and have a floor effect at 50  $\mu\text{m}$ . The seeming difference in our two studies related to structural glaucoma damage related to strains may actually, therefore, be another indication that stage of glaucoma damage is related to LC strain behavior.

The validity of these OCT strain measurements was further confirmed by the finding that strains exceeded the reproducibility error. Furthermore, in dividing our test subjects into those whose IOP did not change with medication alteration and those that did, we could show that strains were largely insignificant when IOP was not different from baseline.

While our data had significant associations with the present sample, it will be important to substantially expand the dataset to confirm several important hypotheses. Further studies should include imaging of non-glaucoma control persons who would be consented to take eyedrops to lower IOP. These should include both fully normal, age-matched persons, as well as ocular hypertensive eyes with no damage. The expansion of the sample size could also allow estimation of the potential effects on strain of other variables, such as axial length, refraction, sex, and race. Our statistical method accounted for the inclusion of both eyes of some patients, but further work should expand the bilateral testing to explore the possibility that an eye that is more damaged, or more likely to be damaged in the future, has different strain behavior.

In conclusion, the use of DVC analysis of OCT images before and after IOP change is a feasible means for measuring *in vivo* LC strains. The strain measures were confirmed as greater with worse visual field damage, suggesting that with further research such imaging may provide a biomarker for glaucoma



susceptibility at routine clinic visits. Longitudinal studies are merited to investigate the biomechanical response to IOP change over time in these patients.

## References

- 
- <sup>1</sup> Tham YC, Li X, Wong TY, Quigley HA, Aung T, Cheng CY. Global prevalence of glaucoma and projections of glaucoma burden through 2040: a systematic review and meta-analysis. *Ophthalmology*. 2014 Nov;121(11):2081-90. doi: 10.1016/j.ophtha.2014.05.013. Epub 2014 Jun 26. PMID: 24974815.
- <sup>2</sup> Heijl A, Leske MC, Bengtsson B, Hyman L, Bengtsson B, Hussein M; Early Manifest Glaucoma Trial Group. Reduction of intraocular pressure and glaucoma progression: results from the Early Manifest Glaucoma Trial. *Arch Ophthalmol*. 2002 Oct;120(10):1268-79. doi: 10.1001/archopht.120.10.1268. PMID: 12365904.
- <sup>3</sup> Boland MV, Quigley HA. Risk factors and open-angle glaucoma: classification and application. *J Glaucoma*. 2007 Jun-Jul;16(4):406-18. doi: 10.1097/IJG.0b013e31806540a1. PMID: 17571004.
- <sup>4</sup> Chauhan BC, Malik R, Shuba LM, Rafuse PE, Nicolela MT, Artes PH. Rates of glaucomatous visual field change in a large clinical population. *Invest Ophthalmol Vis Sci*. 2014 Jun 10;55(7):4135-43. doi: 10.1167/iovs.14-14643. PMID: 24917147.
- <sup>5</sup> Quigley HA, Addicks EM, Green WR, Maumenee AE. Optic nerve damage in human glaucoma. II. The site of injury and susceptibility to damage. *Arch Ophthalmol*. 1981;99(4):635-649.
- <sup>6</sup> Quigley HA, Addicks EM. Regional Differences in the Structure of the Lamina Cribrosa and Their Relation to Glaucomatous Optic Nerve Damage. *Arch Ophthalmol*. 1981;99(1). doi:10.1001/archopht.1981.03930010139020
- <sup>7</sup> Burgoyne CF, Crawford Downs J, Bellezza AJ, Francis Suh JK, Hart RT. The optic nerve head as a biomechanical structure: A new paradigm for understanding the role of IOP-related stress and strain in the pathophysiology of glaucomatous optic nerve head damage. *Prog Retin Eye Res*. 2005;24(1). doi:10.1016/j.preteyeres.2004.06.001

- 
- <sup>8</sup> Quigley HA. The contribution of the sclera and lamina cribrosa to the pathogenesis of glaucoma: Diagnostic and treatment implications. In: Progress in Brain Research. Vol 220. ; 2015.  
doi:10.1016/bs.pbr.2015.04.003
- <sup>9</sup> Beotra MR, Wang X, Tun TA, et al. In vivo three-dimensional lamina cribrosa strains in healthy, ocular hypertensive, and glaucoma eyes following acute intraocular pressure elevation. Invest Ophthalmol Vis Sci. 2018;59(1). doi:10.1167/iops.17-21982
- <sup>10</sup> Zhang L, Beotra MR, Baskaran M, et al. In vivo measurements of prelamina and lamina cribrosa biomechanical properties in humans. Invest Ophthalmol Vis Sci. 2020;61(3). doi:10.1167/iops.61.3.27
- <sup>11</sup> Girard MJA, Beotra MR, Chin KS, et al. In Vivo 3-Dimensional Strain Mapping of the Optic Nerve Head Following Intraocular Pressure Lowering by Trabeculectomy. Ophthalmology. 2016;123(6).  
doi:10.1016/j.ophtha.2016.02.008
- <sup>12</sup> Wang X, Beotra MR, Tun TA, et al. In vivo 3-dimensional strain mapping confirms large optic nerve head deformations following horizontal eye movements. Invest Ophthalmol Vis Sci. 2016;57(13).  
doi:10.1167/iops.16-20560
- <sup>13</sup> Wei J, Yang B, Voorhees AP, et al. Measuring in-vivo and in-situ ex-vivo the 3D deformation of the lamina cribrosa microstructure under elevated intraocular pressure. Proc. SPIE 10496, Optical Elastography and Tissue Biomechanics V, 1049611 (19 February 2018);2018. doi:10.1117/12.2291243
- <sup>14</sup> Midgett DE, Quigley HA, Nguyen TD. In vivo characterization of the deformation of the human optic nerve head using optical coherence tomography and digital volume correlation. *Acta Biomater.* 2019;96:385-399. doi:10.1016/j.actbio.2019.06.050
- <sup>15</sup> Czerpak CA, Kashaf MS, Zimmerman BK, Quigley HA, Nguyen TD. The Strain Response to Intraocular Pressure Decrease in the Lamina Cribrosa of Patients with Glaucoma. *Ophthalmol Glaucoma.* 2022.  
doi:<https://doi.org/10.1016/j.ogla.2022.07.005>

- 
- <sup>16</sup> Chuangsuwanich T, Tun TA, Braeu FA, Wang X, Chin ZY, Panda SK, Buist M, Strouthidis N, Perera S, Nongpiur M, Aung T, Girard MJA. Differing Associations between Optic Nerve Head Strains and Visual Field Loss in Patients with Normal- and High-Tension Glaucoma. *Ophthalmology*. 2023 Jan;130(1):99-110. doi: 10.1016/j.ophtha.2022.08.007. Epub 2022 Aug 11. PMID: 35964710.
- <sup>17</sup> Quigley HA, Hohman RM, Addicks EM, Massof RW, Richard Green W. Morphologic changes in the lamina cribrosa correlated with neural loss in open-angle glaucoma. *Am J Ophthalmol*. 1983;95(5). doi:10.1016/0002-9394(83)90389-6
- <sup>18</sup> Bar-Kochba E, Toyjanova J, Andrews E, Kim KS, Franck C. A Fast Iterative Digital Volume Correlation Algorithm for Large Deformations. *Exp Mech*. 2015;55(1). doi:10.1007/s11340-014-9874-2
- <sup>19</sup> Midgett DE, Pease ME, Jefferys JL, et al. The pressure-induced deformation response of the human lamina cribrosa: Analysis of regional variations. *Acta Biomater*. 2017;53:123-139. doi:10.1016/j.actbio.2016.12.054
- <sup>20</sup> Midgett DE, Jefferys JL, Quigley HA, Nguyen TD. The inflation response of the human lamina cribrosa and sclera: Analysis of deformation and interaction. *Acta Biomater*. 2020;106. doi:10.1016/j.actbio.2020.01.049
- <sup>21</sup> Midgett D, Liu B, Ling YTT, Jefferys JL, Quigley HA, Nguyen TD. The effects of glaucoma on the pressure-induced strain response of the human lamina cribrosa. *Invest Ophthalmol Vis Sci*. 2020;61(4). doi:10.1167/iovs.61.4.41
- <sup>22</sup> Coudrillier B, Tian J, Alexander S, Myers KM, Quigley HA, Nguyen TD. Biomechanics of the human posterior sclera: age- and glaucoma-related changes measured using inflation testing. *Invest Ophthalmol Vis Sci*. 2012 Apr 2;53(4):1714-28. doi: 10.1167/iovs.11-8009.
- <sup>23</sup> Grytz R, Fazio MA, Girard MJ, Libertiaux V, Bruno L, Gardiner S, Girkin CA, Downs JC. Material properties of the posterior human sclera. *J Mech Behav Biomed Mater*. 2014 Jan;29:602-17. doi: 10.1016/j.jmbbm.2013.03.027..

---

<sup>24</sup> Guan C, Pease ME, Quillen S, et al. Quantitative Microstructural Analysis of Cellular and Tissue Remodeling in Human Glaucoma Optic Nerve Head. *Investig Ophthalmol Vis Sci*. 2022;63(11).

doi:10.1167/IOVS.63.11.18

<sup>25</sup> Czerpak C, Ling YTT, Jefferys JL, Quigley HA, Nguyen TD. The Curvature and Collagen Network of the Human Lamina Cribrosa in Glaucoma and Control Eyes. *Invest Ophthalmol Vis Sci*. 2021;62(8):1656.

<sup>26</sup> Yang H, Ren R, Lockwood H, et al. The connective tissue components of optic nerve head cupping in monkey experimental glaucoma part 1: Global change. *Invest Ophthalmol Vis Sci*. 2015;56(13).

doi:10.1167/iovs.15-17624

<sup>27</sup> Jonas JB, Berenshtein E, Holbach L. Anatomic Relationship between Lamina Cribrosa, Intraocular Space, and Cerebrospinal Fluid Space. *Invest Ophthalmol Vis Sci*. 2003;44(12):5189-5195.

doi:10.1167/iovs.03-0174

<sup>28</sup> Pijanka JK, Coudrillier B, Ziegler K, et al. Quantitative mapping of collagen fiber orientation in non-glaucoma and glaucoma posterior human sclerae. *Invest Ophthalmol Vis Sci*. 2012;53(9):5258-5270.

doi:10.1167/iovs.12-9705

<sup>29</sup> Boote C, Sigal IA, Grytz R, Hua Y, Nguyen TD, Girard MJA. Scleral structure and biomechanics. *Prog Retin Eye Res*. 2020;74. doi:10.1016/j.preteyeres.2019.100773

<sup>30</sup> Yuan Z, Czerpak CA, Kashaf MS, Quigley HA, Nguyen TD. Biomechanical Strain Responses in the Optic Nerve Head Region in Glaucoma Patients After Intraocular Pressure Lowering.

medRxiv 2023.05.30.23290662; doi: <https://doi.org/10.1101/2023.05.30.23290662>
